# Supplementary material for: The effect of phenol functionality on the characteristic features and performance of fully aromatic polyester thin film composite nanofiltration membranes
Source: Royal Society of Chemistry journal article supplement (doi:10.1039/c6ra23061j), 2016-01-01
Supplement: c6ra23061j1.pdf [file c6ra23061j1.pdf]

**Effect of phenol functionality on characteristic features and performance of fully aromatic polyester thin film composite nanofiltration membranes**

Anupam Bera,<sup>a,b</sup> Dixit V. Bhalani,<sup>a</sup> Suresh K. Jewrajka<sup>a,b\*</sup> and Pushpito K. Ghosh<sup>b,c\*</sup>

<sup>a</sup>CSIR-Central Salt and Marine Chemicals Research Institute, G. B. Marg, Bhavnagar, Gujarat, India

<sup>b</sup>AcSIR-Central Salt & Marine Chemicals Research Institute, G. B Marg, Bhavnagar-364002, Gujarat, India

<sup>c</sup>Department of Chemical Engineering, Institute of Chemical Technology, Nathalal Parekh Road, Matunga, Mumbai 400019, Maharashtra, India

\*Corresponding author

Suresh K. Jewrajka: Email: [skjewrajka@csmcri.org](mailto:skjewrajka@csmcri.org); Fax: +912782566511; Tel.: +912782566511

Pushpito K. Ghosh: Email: [pushpitokghosh@gmail.com](mailto:pushpitokghosh@gmail.com); Phone: +919820363115

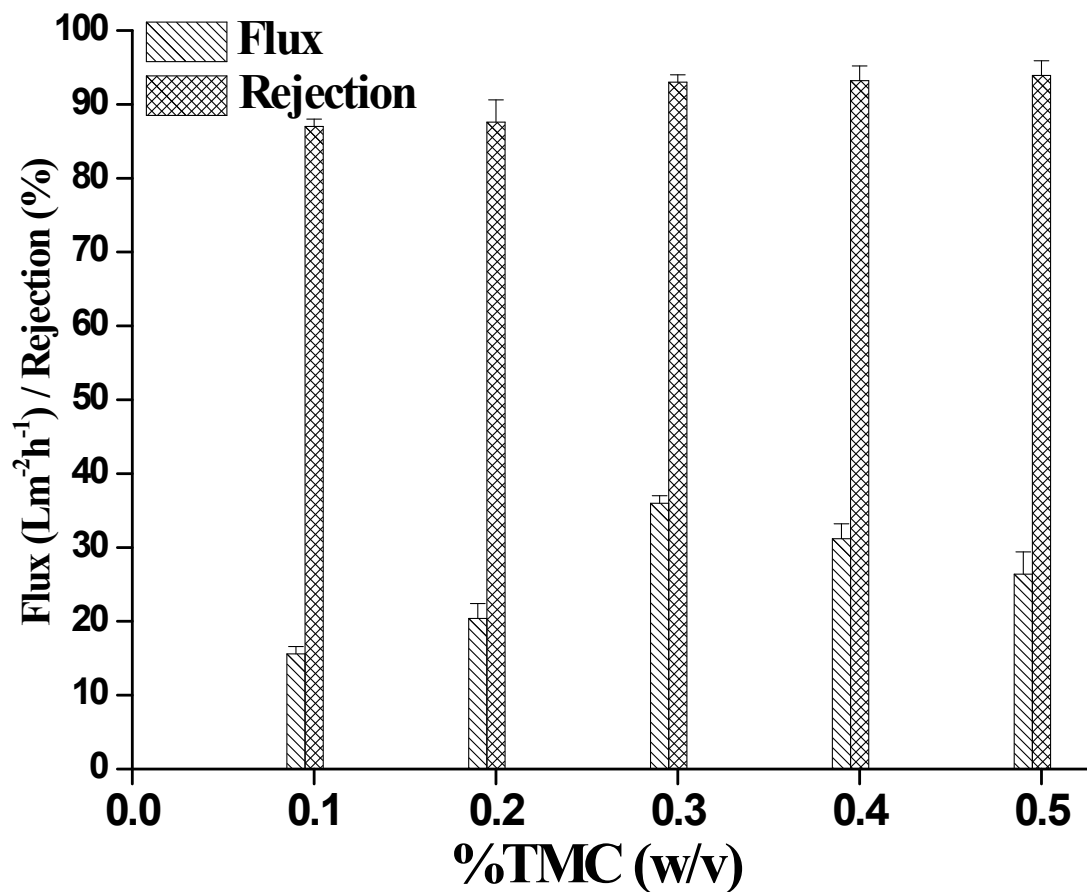

**Fig. S1.** Bar diagram showing Na<sub>2</sub>SO<sub>4</sub> (1500 ppm in feed, pH~7) rejection efficiency and water flux of PE TFC membrane prepared from 1:2 (w/w) resorcinol:phloroglucinol (total 3 %, w/v in water) and varying concentrations of TMC. The operating pressure was 0.5 MPa.

**Table S1.** Ionic radii of hydrated ions

| No. | Ion                           | Mean ion-water internuclear distances for first hydration shell (Y. Marcus)/ nm <sup>a</sup> | Second hydration shell (from computation) |
|-----|-------------------------------|----------------------------------------------------------------------------------------------|-------------------------------------------|
| 1.  | Na <sup>+</sup>               | 0.2356 ± 0.0060                                                                              | 0.450-0.480 <sup>b</sup>                  |
| 2.  | K <sup>+</sup>                | 0.2798 ± 0.0081                                                                              | 0.460-0.530 <sup>b</sup>                  |
| 3.  | Mg <sup>2+</sup>              | 0.2090 ± 0.0041                                                                              | 0.410-0.428 <sup>c</sup>                  |
| 4.  | Ca <sup>2+</sup>              | 0.2422 ± 0.0052                                                                              | 0.450-0.460 <sup>c</sup>                  |
| 5.  | Fe <sup>3+</sup>              | 0.2031 ± 0.0019                                                                              | 0.409-0.480 <sup>c</sup>                  |
| 6.  | F <sup>-</sup>                | 0.2630 ± 0.0025                                                                              | -                                         |
| 7.  | Cl <sup>-</sup>               | 0.3187 ± 0.0067                                                                              | -                                         |
| 8.  | Br <sup>-</sup>               | 0.3373 ± 0.0054                                                                              | -                                         |
| 9.  | SO <sub>4</sub> <sup>2-</sup> | 0.3815 ± 0.0071                                                                              | -                                         |

<sup>a</sup> See Table XIII (reference 31); <sup>b</sup>Table 16 and <sup>c</sup>Table 17 (reference 32)

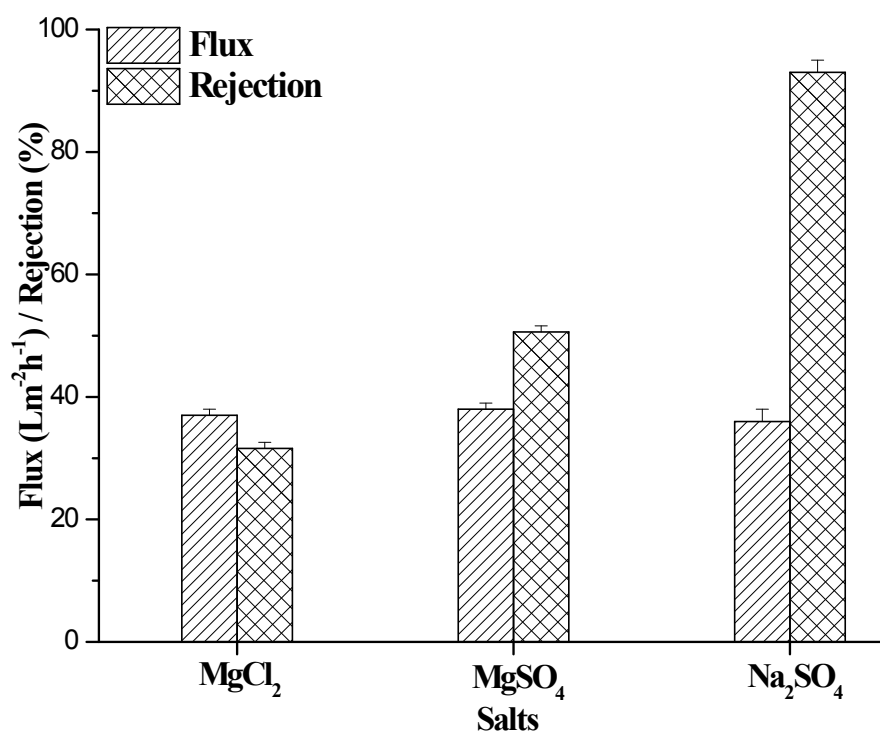

**Fig. S2.** Bar diagrams showing rejection and flux data for experiments conducted with aqueous solutions of MgCl<sub>2</sub>, MgSO<sub>4</sub> and Na<sub>2</sub>SO<sub>4</sub> on PE TFC membrane prepared from 1:2 (w/w) resorcinol:phloroglucinol (total 3 % w/v in water) and TMC (0.3 w/v). Feed concentration: 1500 ppm; pH~7; operating pressure: 0.5 MPa.
